# Supplementary material
Source: PubMed Central journal article supplement (PMC6132253)
Supplement: NIHMS1502521-supplement-supplement_1.pdf [file NIHMS1502521-supplement-supplement_1.pdf]

|                          | Site                           |      |                                      |      |                                                     |      |                                                 |      |                                |      |               |      |
|--------------------------|--------------------------------|------|--------------------------------------|------|-----------------------------------------------------|------|-------------------------------------------------|------|--------------------------------|------|---------------|------|
|                          | National Jewish Health (N=100) |      | University of North Carolina (N=127) |      | Johns Hopkins University School of Medicine (N=110) |      | Icahn School of Medicine at Mount Sinai (N=226) |      | University of Arkansas (N=142) |      | Total (N=705) |      |
|                          | N                              | %    | N                                    | %    | N                                                   | %    | N                                               | %    | N                              | %    | N             | %    |
| No                       | 90                             | 90.0 | 112                                  | 88.2 | 96                                                  | 87.3 | 222                                             | 98.2 | 67                             | 47.2 | 587           | 83.3 |
| Yes                      | 10                             | 10.0 | 13                                   | 10.2 | 14                                                  | 12.7 | 2                                               | 0.9  | 75                             | 52.8 | 114           | 16.2 |
| Unknown                  | 0                              | 0.0  | 2                                    | 1.6  | 0                                                   | 0.0  | 2                                               | 0.9  | 0                              | 0.0  | 4             | 0.6  |
| <b>Private Insurance</b> |                                |      |                                      |      |                                                     |      |                                                 |      |                                |      |               |      |
| No                       | 11                             | 11.0 | 16                                   | 12.6 | 13                                                  | 11.8 | 4                                               | 1.8  | 58                             | 40.8 | 102           | 14.5 |
| Yes                      | 89                             | 89.0 | 109                                  | 85.8 | 97                                                  | 88.2 | 222                                             | 98.2 | 84                             | 59.2 | 601           | 85.2 |
| Unknown                  | 0                              | 0.0  | 2                                    | 1.6  | 0                                                   | 0.0  | 0                                               | 0.0  | 0                              | 0.0  | 2             | 0.3  |

**Table E2:** Comparison of PPI-confirmed EoE patients (EoE histologically confirmed following >6 weeks course of a PPI at a high dose) versus those not confirmed (no PPI course received or unsure)

|                                   | Greater than 6 week course of high-dose PPI |       |           |       | P-value      |
|-----------------------------------|---------------------------------------------|-------|-----------|-------|--------------|
|                                   | Yes                                         |       | No/Unsure |       |              |
|                                   | N*                                          | %     | N**       | %     |              |
| <b>Total Subjects</b>             | 386                                         | 100.0 | 319       | 100.0 |              |
| <b>Gender</b>                     |                                             |       |           |       | 0.19         |
| Male                              | 255                                         | 66.1  | 226       | 70.8  |              |
| Female                            | 131                                         | 33.9  | 93        | 29.2  |              |
| <b>Symptoms</b>                   |                                             |       |           |       |              |
| Abdominal Pain                    | 208                                         | 53.9  | 169       | 53.1  | 0.88         |
| Nausea                            | 153                                         | 39.7  | 128       | 40.3  | 0.94         |
| Vomiting                          | 162                                         | 42.0  | 120       | 37.6  | 0.25         |
| Heartburn                         | 138                                         | 36.4  | 121       | 38.2  | 0.64         |
| Chest Pain                        | 77                                          | 20.0  | 71        | 22.3  | 0.46         |
| Gastroesophageal Reflux           | 204                                         | 52.8  | 158       | 49.5  | 0.41         |
| Dysphagia                         | 187                                         | 48.4  | 169       | 53.0  | 0.26         |
| Esophageal Food Impactions        | 141                                         | 36.5  | 127       | 39.9  | 0.39         |
| Diarrhea                          | 121                                         | 31.3  | 105       | 32.9  | 0.69         |
| Bloody Stools                     | 28                                          | 7.3   | 25        | 7.8   | 0.78         |
| <b>Co-morbidities</b>             |                                             |       |           |       |              |
| <b>Gastrointestinal disorders</b> |                                             |       |           |       |              |
| GERD                              | 230                                         | 59.6  | 152       | 47.6  | <b>0.002</b> |
| Barrett's esophagus               | 0                                           | 0.0   | 3         | 0.9   | 0.09         |
| Celiac disease                    | 10                                          | 2.6   | 4         | 1.3   | 0.28         |
| Irritable bowel syndrome          | 23                                          | 6.0   | 23        | 7.2   | 0.54         |
| Crohn's disease                   | 3                                           | 0.8   | 1         | 0.3   | 0.63         |
| Ulcerative colitis                | 6                                           | 1.6   | 1         | 0.3   | 0.13         |

|                                             | Greater than 6 week course of high-dose PPI |      |           |      | P-value     |
|---------------------------------------------|---------------------------------------------|------|-----------|------|-------------|
|                                             | Yes                                         |      | No/Unsure |      |             |
|                                             | N*                                          | %    | N**       | %    |             |
| Other gastrointestinal disorders            | 20                                          | 5.5  | 16        | 5.2  | 1.00        |
| <b>Allergic disorders</b>                   |                                             |      |           |      |             |
| Allergic conjunctivitis                     | 124                                         | 32.1 | 96        | 30.1 | 0.57        |
| Allergic rhinitis                           | 236                                         | 61.1 | 189       | 59.2 | 0.64        |
| Asthma                                      | 177                                         | 45.9 | 143       | 44.8 | 0.82        |
| Eczema                                      | 176                                         | 45.6 | 151       | 47.3 | 0.65        |
| Urticaria                                   | 99                                          | 25.6 | 86        | 27.0 | 0.73        |
| Angioedema                                  | 49                                          | 12.7 | 44        | 13.8 | 0.74        |
| Food allergy                                | 249                                         | 64.7 | 223       | 69.9 | 0.15        |
| Food anaphylaxis                            | 102                                         | 26.9 | 86        | 27.2 | 0.93        |
| Drug anaphylaxis                            | 43                                          | 11.1 | 33        | 10.3 | 0.81        |
| Latex allergy                               | 24                                          | 6.2  | 24        | 7.5  | 0.55        |
| <b>Infectious/immunological disorders</b>   |                                             |      |           |      |             |
| Sinusitis                                   | 118                                         | 30.6 | 83        | 26.0 | 0.21        |
| Pneumonia                                   | 94                                          | 24.4 | 79        | 24.8 | 0.93        |
| Immunodeficiency                            | 9                                           | 2.3  | 9         | 2.8  | 0.81        |
| Autoimmune disease                          | 16                                          | 4.1  | 17        | 5.3  | 0.48        |
| <b>Neurological/developmental disorders</b> |                                             |      |           |      |             |
| Developmental delay                         | 48                                          | 12.4 | 31        | 9.7  | 0.28        |
| Prematurity                                 | 28                                          | 7.3  | 20        | 6.3  | 0.65        |
| Depression/anxiety                          | 63                                          | 16.3 | 46        | 14.4 | 0.53        |
| Autism/behavioral disorder                  | 32                                          | 8.3  | 12        | 3.8  | <b>0.02</b> |
| Mitochondrial disorder                      | 3                                           | 0.8  | 0         | 0.0  | 0.26        |
| <b>Other systemic problems</b>              |                                             |      |           |      |             |

|                                | Greater than 6 week course of high-dose PPI |      |           |      | P-value |
|--------------------------------|---------------------------------------------|------|-----------|------|---------|
|                                | Yes                                         |      | No/Unsure |      |         |
|                                | N*                                          | %    | N**       | %    |         |
| Failure to thrive              | 88                                          | 22.8 | 62        | 19.4 | 0.31    |
| <b><i>Surgical history</i></b> |                                             |      |           |      |         |
| Tympanostomy tube placement    | 77                                          | 19.9 | 61        | 19.1 | 0.85    |
| Sinus surgery                  | 15                                          | 3.9  | 9         | 2.8  | 0.53    |
| Fundoplication                 | 4                                           | 1.0  | 1         | 0.3  | 0.38    |
| Gastrostomy tube placement     | 21                                          | 5.4  | 20        | 6.3  | 0.75    |

\* Number who had PPI therapy. Number of missing or unknown values in PPI group (from highest to lowest): Crohn's disease (n=22), ulcerative colitis (n=22), other GI disorders (n=22), food anaphylaxis(n=7), heartburn (n=7), nausea (n=1), chest pain (n=1), and food allergy (n=1).

\*\* Number who did not have (or were unsure) PPI therapy. Number of missing or unknown values in no/unsure PPI group (from highest to lowest): Crohn's disease (n=12), ulcerative colitis (n=12), other GI disorders (n=12), food anaphylaxis (n=3), heartburn (n=2), nausea (n=1), chest pain (n=1), latex allergy (n=1), esophageal food impactions (n=1), and abdominal pain (n=1).

**Table E3:** Percent of subjects with food allergies stratified by age at enrollment.

|           | Patients <11 years of age |      |              |      |                               |      | Patients 11-17 years of age |      |              |      |                               |      | Patients ≥18 years of age |      |              |      |                               |      | Total    |      |              |      |                               |      |
|-----------|---------------------------|------|--------------|------|-------------------------------|------|-----------------------------|------|--------------|------|-------------------------------|------|---------------------------|------|--------------|------|-------------------------------|------|----------|------|--------------|------|-------------------------------|------|
|           | Allergic                  |      | Not Allergic |      | Unknown/<br>Never<br>Ingested |      | Allergic                    |      | Not Allergic |      | Unknown/<br>Never<br>Ingested |      | Allergic                  |      | Not Allergic |      | Unknown/<br>Never<br>Ingested |      | Allergic |      | Not Allergic |      | Unknown/<br>Never<br>Ingested |      |
|           | N                         | %    | N            | %    | N                             | %    | N                           | %    | N            | %    | N                             | %    | N                         | %    | N            | %    | N                             | %    | N        | %    | N            | %    | N                             | %    |
| Milk      | 138                       | 40.0 | 150          | 43.5 | 57                            | 16.5 | 37                          | 19.6 | 113          | 59.8 | 39                            | 20.6 | 21                        | 12.3 | 112          | 65.5 | 38                            | 22.2 | 196      | 27.8 | 375          | 53.2 | 134                           | 19.0 |
| Egg       | 102                       | 29.6 | 153          | 44.3 | 90                            | 26.1 | 30                          | 15.9 | 115          | 60.8 | 44                            | 23.3 | 18                        | 10.5 | 112          | 65.5 | 41                            | 24.0 | 150      | 21.3 | 380          | 53.9 | 175                           | 24.8 |
| Peanut    | 68                        | 19.7 | 155          | 44.9 | 122                           | 35.4 | 50                          | 26.5 | 106          | 56.1 | 33                            | 17.5 | 23                        | 13.5 | 105          | 61.4 | 43                            | 25.1 | 141      | 20.0 | 366          | 51.9 | 198                           | 28.1 |
| Fish      | 25                        | 7.2  | 210          | 60.9 | 110                           | 31.9 | 13                          | 6.9  | 123          | 65.1 | 53                            | 28.0 | 10                        | 5.8  | 116          | 67.8 | 45                            | 26.3 | 48       | 6.8  | 449          | 63.7 | 208                           | 29.5 |
| Shellfish | 24                        | 7.0  | 193          | 55.9 | 128                           | 37.1 | 14                          | 7.4  | 118          | 62.4 | 57                            | 30.2 | 11                        | 6.4  | 113          | 66.1 | 47                            | 27.5 | 49       | 7.0  | 424          | 60.1 | 232                           | 32.9 |
| Tree Nuts | 40                        | 11.6 | 156          | 45.2 | 149                           | 43.2 | 39                          | 20.6 | 99           | 52.4 | 51                            | 27.0 | 26                        | 15.2 | 105          | 61.4 | 40                            | 23.4 | 105      | 14.9 | 360          | 51.1 | 240                           | 34.0 |
| Barley    | 16                        | 4.6  | 203          | 58.8 | 126                           | 36.5 | 5                           | 2.6  | 132          | 69.8 | 52                            | 27.5 | 4                         | 2.3  | 113          | 66.1 | 54                            | 31.6 | 25       | 3.5  | 448          | 63.5 | 232                           | 32.9 |
| Beef      | 31                        | 9.0  | 214          | 62.0 | 100                           | 29.0 | 14                          | 7.4  | 130          | 68.8 | 45                            | 23.8 | 9                         | 5.3  | 116          | 67.8 | 46                            | 26.9 | 54       | 7.7  | 460          | 65.2 | 191                           | 27.1 |
| Chicken   | 22                        | 6.4  | 236          | 68.4 | 87                            | 25.2 | 11                          | 5.8  | 144          | 76.2 | 34                            | 18.0 | 6                         | 3.5  | 118          | 69.0 | 47                            | 27.5 | 39       | 5.5  | 498          | 70.6 | 168                           | 23.8 |
| Corn      | 23                        | 6.7  | 250          | 72.5 | 72                            | 20.9 | 6                           | 3.2  | 140          | 74.1 | 43                            | 22.8 | 9                         | 5.3  | 117          | 68.4 | 45                            | 26.3 | 38       | 5.4  | 507          | 71.9 | 160                           | 22.7 |
| Lamb      | 9                         | 2.6  | 185          | 53.6 | 151                           | 43.8 | 4                           | 2.1  | 129          | 68.3 | 56                            | 29.6 | 4                         | 2.3  | 117          | 68.4 | 50                            | 29.2 | 17       | 2.4  | 431          | 61.1 | 257                           | 36.5 |
| Oat       | 19                        | 5.5  | 224          | 64.9 | 102                           | 29.6 | 6                           | 3.2  | 136          | 72.0 | 47                            | 24.9 | 7                         | 4.1  | 116          | 67.8 | 48                            | 28.1 | 32       | 4.5  | 476          | 67.5 | 197                           | 27.9 |
| Peas      | 28                        | 8.1  | 207          | 60.0 | 110                           | 31.9 | 6                           | 3.2  | 128          | 67.7 | 55                            | 29.1 | 7                         | 4.1  | 115          | 67.3 | 49                            | 28.7 | 41       | 5.8  | 450          | 63.8 | 214                           | 30.4 |
| Pork      | 18                        | 5.2  | 225          | 65.2 | 102                           | 29.6 | 7                           | 3.7  | 138          | 73.0 | 44                            | 23.3 | 3                         | 1.8  | 119          | 69.6 | 49                            | 28.7 | 28       | 4.0  | 482          | 68.4 | 195                           | 27.7 |
| Potato    | 12                        | 3.5  | 256          | 74.2 | 77                            | 22.3 | 4                           | 2.1  | 145          | 76.7 | 40                            | 21.2 | 4                         | 2.3  | 116          | 67.8 | 51                            | 29.8 | 20       | 2.8  | 517          | 73.3 | 168                           | 23.8 |
| Rye       | 9                         | 2.6  | 203          | 58.8 | 133                           | 38.6 | 3                           | 1.6  | 131          | 69.3 | 55                            | 29.1 | 5                         | 2.9  | 113          | 66.1 | 53                            | 31.0 | 17       | 2.4  | 447          | 63.4 | 241                           | 34.2 |
| Soy       | 65                        | 18.8 | 204          | 59.1 | 76                            | 22.0 | 20                          | 10.6 | 126          | 66.7 | 43                            | 22.8 | 17                        | 9.9  | 113          | 66.1 | 41                            | 24.0 | 102      | 14.5 | 443          | 62.8 | 160                           | 22.7 |
| Turkey    | 12                        | 3.5  | 239          | 69.3 | 94                            | 27.2 | 10                          | 5.3  | 138          | 73.0 | 41                            | 21.7 | 6                         | 3.5  | 118          | 69.0 | 47                            | 27.5 | 28       | 4.0  | 495          | 70.2 | 182                           | 25.8 |
| Wheat     | 56                        | 16.2 | 207          | 60.0 | 82                            | 23.8 | 14                          | 7.4  | 132          | 69.8 | 43                            | 22.8 | 17                        | 9.9  | 109          | 63.7 | 45                            | 26.3 | 87       | 12.3 | 448          | 63.5 | 170                           | 24.1 |

**Table E4:** Percent of subjects with family history of various diseases

|                                          | History in $\geq 1$ Parent |         | History in $\geq 1$ Sibling |         |
|------------------------------------------|----------------------------|---------|-----------------------------|---------|
|                                          | N Total#                   | % Cases | N Total#                    | % Cases |
| Asthma                                   | 694                        | 31.6    | 558                         | 26.2    |
| Allergic rhinitis                        | 694                        | 52.6    | 558                         | 34.4    |
| Atopic Dermatitis                        | 694                        | 23.6    | 558                         | 26.7    |
| Urticaria                                | 694                        | 16.1    | 558                         | 9.1     |
| Angioedema                               | 694                        | 5.8     | 558                         | 4.3     |
| Food allergy                             | 694                        | 27.1    | 558                         | 26.3    |
| Eosinophilic esophagitis                 | 694                        | 3.0     | 558                         | 4.5     |
| Gastroesophageal reflux disease (GERD)   | 694                        | 29.0    | 558                         | 7.7     |
| Food Impaction                           | 694                        | 8.1     | 558                         | 1.1     |
| Esophageal dilation                      | 694                        | 5.2     | 558                         | 0.4     |
| Eosinophilic GI disorder (excluding EoE) | 694                        | 2.9     | 558                         | 2.9     |
| Hypereosinophilic syndrome               | 694                        | 0.1     | 558                         | 0.0     |
| Immunodeficiency                         | 694                        | 1.2     | 558                         | 0.2     |
| Inflammatory bowel disease               | 694                        | 7.9     | 558                         | 2.3     |
| Barrett's esophagus                      | 694                        | 0.9     | 558                         | 0.2     |
| Esophageal cancer                        | 694                        | 0.0     | 558                         | 0.0     |
| Autoimmune disease                       | 694                        | 6.9     | 558                         | 2.0     |
| Celiac disease                           | 694                        | 1.4     | 558                         | 1.6     |

# Number of subjects with data available.
